# Supplementary material for: Estimated Effectiveness of a Primary Cycle of Protein Recombinant Vaccine NVX-CoV2373 Against COVID-19
Source: PubMed Central journal article supplement (PMC10551773; doi:10.1001/jamanetworkopen.2023.36854), 2023-10-04
Supplement: jamanetwopen-e2336854-s001.pdf [file jamanetwopen-e2336854-s001.pdf]

## Supplemental Online Content

Mateo-Urdiales A, Sacco C, Petrone D, et al; Italian National COVID-19 Integrated Surveillance System and the Italian COVID-19 vaccines registry. Estimated effectiveness of a primary cycle of protein recombinant vaccine NVX-CoV2373 against COVID-19. *JAMA Netw Open*. 2023;6(10):e2336854. doi:10.1001/jamanetworkopen.2023.36854

**eTable 1.** Vaccine Effectiveness Against Notified SARS-CoV-2 Infection and Symptomatic COVID-19 in Those Starting the Primary Cycle With Novavax (NVX-CoV2373) From February 28 to September 4, 2022, Italy

**eTable 2.** Vaccine Effectiveness Against Notified SARS-CoV-2 Infection and Symptomatic COVID-19 for Novavax (NVX-CoV2373) According to Time From Full Vaccination ( $\geq 15$  Days From Second Dose)

## Results from sensitivity analysis where the reference period is days 0-14 post first dose administration.

**eTable 1. Vaccine Effectiveness Against Notified SARS-CoV-2 Infection and Symptomatic COVID-19 in Those Starting the Primary Cycle With Novavax (NVX-CoV2373) From February 28 to September 4, 2022, Italy**

| Outcome                      | Vaccination status        | Person-days | Events | Crude rate<br>(per 100 000 person-days) | VE (95% CI)   |
|------------------------------|---------------------------|-------------|--------|-----------------------------------------|---------------|
| <b>All infections</b>        | 0-14 days post first dose | 310,650     | 622    | 200.2                                   | Reference     |
|                              | Partial vaccination*      | 510,152     | 1,001  | 196.2                                   | 8% (-3%-17%)  |
|                              | Full vaccination**        | 1,908,025   | 2,811  | 147.3                                   | 17% (8%-25%)  |
| <b>Symptomatic infection</b> | 0-14 days post first dose | 310,650     | 225    | 72.4                                    | Reference     |
|                              | Partial vaccination*      | 510,152     | 360    | 70.6                                    | 12% (-4%-26%) |
|                              | Full vaccination**        | 1,908,025   | 873    | 45.8                                    | 35% (25%-44%) |
| <b>Hospitalisation</b>       | 0-14 days post first dose | 310,650     | 3      | 1.0                                     | -             |
|                              | Partial vaccination*      | 510,152     | 7      | 1.4                                     | -             |
|                              | Full vaccination**        | 1,908,025   | 18     | 0.9                                     | -             |

IRR = Incidence Rate Ratio.  
 VE = Vaccine Effectiveness.  
 \*15 days post first dose to 14 days post second dose  
 \*\*15+ days post second dose

**eTable 2. Vaccine Effectiveness Against Notified SARS-CoV-2 Infection and Symptomatic COVID-19 for Novavax (NVX-CoV2373) According to Time From Full Vaccination ( $\geq 15$  Days From Second Dose)**

| Outcome                | Vaccination status           | Person-days | Events | Crude rate<br>(per 100 000 person-days) | VE (95% CI)   |
|------------------------|------------------------------|-------------|--------|-----------------------------------------|---------------|
| All infections         | 0-14 days post first dose    | 310,650     | 622    | 200.2                                   | Reference     |
|                        | Full vaccination 0-29 days   | 504,653     | 602    | 119.3                                   | 29% (17%-39%) |
|                        | Full vaccination 30-59 days  | 488,225     | 459    | 94.0                                    | 26% (12%-38%) |
|                        | Full vaccination 60-89 days  | 467,672     | 983    | 210.2                                   | 5% (-15%-22%) |
|                        | Full vaccination 90-120 days | 447,475     | 767    | 171.4                                   | 14% (-8%-31%) |
| Symptomatic infections | 0-14 days post first dose    | 310,650     | 225    | 72.4                                    | Reference     |
|                        | Full vaccination 0-29 days   | 504,653     | 220    | 43.6                                    | 34% (23%-43%) |
|                        | Full vaccination 30-59 days  | 488,225     | 146    | 29.9                                    | 39% (28%-49%) |
|                        | Full vaccination 60-89 days  | 467,672     | 296    | 63.3                                    | 28% (13%-40%) |
|                        | Full vaccination 90-120 days | 447,475     | 211    | 47.2                                    | 42% (28%-54%) |
