# Supplementary material for: Estimated Effectiveness of a Primary Cycle of Protein Recombinant Vaccine NVX-CoV2373 Against COVID-19
Source: PubMed Central journal article supplement (PMC10551773; doi:10.1001/jamanetworkopen.2023.36854), 2023-10-04
Supplement: jamanetwopen-e2336854-s002.pdf [file jamanetwopen-e2336854-s002.pdf]

\*First name, last name, and suffix (if applicable) are required and will appear in PubMed.

| <b>*Group Name(s): Italian National COVID-19 Integrated Surveillance System and the Italian COVID-19 vaccines registry.</b> |                   |                              |                  |             |                                          |                                                         |                                                                                            |
|-----------------------------------------------------------------------------------------------------------------------------|-------------------|------------------------------|------------------|-------------|------------------------------------------|---------------------------------------------------------|--------------------------------------------------------------------------------------------|
| <b>*First Name and Middle Initial(s)</b>                                                                                    | <b>*Last Name</b> | <b>*Suffix (eg, Jr, III)</b> | Academic Degrees | Institution | Location (city, state/province, country) | Role or Contribution, eg, chair, principal investigator | Group (if more than 1 Group listed in the byline) and/or Subgroup (eg, Steering Committee) |
| Stefano                                                                                                                     | Boros             |                              |                  |             |                                          |                                                         |                                                                                            |
| Fortunato (Paolo)                                                                                                           | D'Ancona          |                              |                  |             |                                          |                                                         |                                                                                            |
| Corrado                                                                                                                     | Di Benedetto      |                              |                  |             |                                          |                                                         |                                                                                            |
| Antonietta                                                                                                                  | Filia             |                              |                  |             |                                          |                                                         |                                                                                            |
| Maria Cristina                                                                                                              | Rota              |                              |                  |             |                                          |                                                         |                                                                                            |
| Marco                                                                                                                       | Tallon            |                              |                  |             |                                          |                                                         |                                                                                            |
| Maria Fenicia                                                                                                               | Vescio            |                              |                  |             |                                          |                                                         |                                                                                            |
| Antonia                                                                                                                     | Petrucci          |                              |                  |             |                                          |                                                         |                                                                                            |
| Michele                                                                                                                     | La Bianca         |                              |                  |             |                                          |                                                         |                                                                                            |
| Anna Domenica                                                                                                               | Mignuoli          |                              |                  |             |                                          |                                                         |                                                                                            |
| Pietro                                                                                                                      | Buono             |                              |                  |             |                                          |                                                         |                                                                                            |
| Erika                                                                                                                       | Massimiliani      |                              |                  |             |                                          |                                                         |                                                                                            |
| Fabio                                                                                                                       | Barbone           |                              |                  |             |                                          |                                                         |                                                                                            |
| Francesco                                                                                                                   | Vario             |                              |                  |             |                                          |                                                         |                                                                                            |
| Camilla                                                                                                                     | Sticchi           |                              |                  |             |                                          |                                                         |                                                                                            |
| Danilo                                                                                                                      | Cereda            |                              |                  |             |                                          |                                                         |                                                                                            |
| Marco                                                                                                                       | Pompili           |                              |                  |             |                                          |                                                         |                                                                                            |
| Francesco                                                                                                                   | Sforza            |                              |                  |             |                                          |                                                         |                                                                                            |
| Pierpaolo                                                                                                                   | Bertoli           |                              |                  |             |                                          |                                                         |                                                                                            |
| Pier Paolo                                                                                                                  | Benetollo         |                              |                  |             |                                          |                                                         |                                                                                            |
| Chiara                                                                                                                      | Pasqualini        |                              |                  |             |                                          |                                                         |                                                                                            |
| Lucia                                                                                                                       | Cisceglia         |                              |                  |             |                                          |                                                         |                                                                                            |
| Maria Antonietta                                                                                                            | Palmas            |                              |                  |             |                                          |                                                         |                                                                                            |
| Sebastiano Pollina                                                                                                          | Addario           |                              |                  |             |                                          |                                                         |                                                                                            |
| Emanuela                                                                                                                    | Balocchini        |                              |                  |             |                                          |                                                         |                                                                                            |
| Anna                                                                                                                        | Tosti             |                              |                  |             |                                          |                                                         |                                                                                            |
| Mauro                                                                                                                       | Ruffier           |                              |                  |             |                                          |                                                         |                                                                                            |
| Filippo                                                                                                                     | Da Re             |                              |                  |             |                                          |                                                         |                                                                                            |
| Serena                                                                                                                      | Battilomo         |                              |                  |             |                                          |                                                         |                                                                                            |
| Valeria                                                                                                                     | Proietti          |                              |                  |             |                                          |                                                         |                                                                                            |

## Supplemental Online Content: Nonauthor Collaborators

\*First name, last name, and suffix (if applicable) are required and will appear in PubMed.

| *First Name and Middle Initial(s) | *Last Name   | *Suffix (eg, Jr, III) | Academic Degrees | Institution | Location (city, state/province, country) | Role or Contribution, eg, chair, principal investigator | Group (if more than 1 Group listed in the byline) and/or Subgroup (eg, Steering Committee) |
|-----------------------------------|--------------|-----------------------|------------------|-------------|------------------------------------------|---------------------------------------------------------|--------------------------------------------------------------------------------------------|
| Camillo                           | Odio         |                       |                  |             |                                          |                                                         |                                                                                            |
| Michele                           | Recine       |                       |                  |             |                                          |                                                         |                                                                                            |
| Innocenza                         | Ruberto      |                       |                  |             |                                          |                                                         |                                                                                            |
| Salvatore                         | Ascione      |                       |                  |             |                                          |                                                         |                                                                                            |
| Massimo                           | Bisogno      |                       |                  |             |                                          |                                                         |                                                                                            |
| Gandolfo                          | Miserendino  |                       |                  |             |                                          |                                                         |                                                                                            |
| Massimiliano                      | Navacchia    |                       |                  |             |                                          |                                                         |                                                                                            |
| Beatrice                          | Del Frate    |                       |                  |             |                                          |                                                         |                                                                                            |
| Emanuela                          | Cau          |                       |                  |             |                                          |                                                         |                                                                                            |
| Diego                             | Baiocchi     |                       |                  |             |                                          |                                                         |                                                                                            |
| Danilo                            | Fusco        |                       |                  |             |                                          |                                                         |                                                                                            |
| Domenico                          | Gallo        |                       |                  |             |                                          |                                                         |                                                                                            |
| Maria Rosa                        | Marchetti    |                       |                  |             |                                          |                                                         |                                                                                            |
| Diego                             | Conforti     |                       |                  |             |                                          |                                                         |                                                                                            |
| Carlo                             | Trentini     |                       |                  |             |                                          |                                                         |                                                                                            |
| Antonino                          | Ruggeri      |                       |                  |             |                                          |                                                         |                                                                                            |
| Concetta                          | Ladalaro     |                       |                  |             |                                          |                                                         |                                                                                            |
| Nehrudoff                         | Albano       |                       |                  |             |                                          |                                                         |                                                                                            |
| Marco                             | Corona       |                       |                  |             |                                          |                                                         |                                                                                            |
| Paolo                             | Lombardi     |                       |                  |             |                                          |                                                         |                                                                                            |
| Massimo                           | Iacono       |                       |                  |             |                                          |                                                         |                                                                                            |
| Paolo Bruno                       | Angori       |                       |                  |             |                                          |                                                         |                                                                                            |
| Andrea                            | Belardinelli |                       |                  |             |                                          |                                                         |                                                                                            |
| Milena                            | Solfiti      |                       |                  |             |                                          |                                                         |                                                                                            |
| Stefano                           | Fioraso      |                       |                  |             |                                          |                                                         |                                                                                            |
| Chiara                            | Poma         |                       |                  |             |                                          |                                                         |                                                                                            |
| Nadia                             | Raccanello   |                       |                  |             |                                          |                                                         |                                                                                            |
