# Supplementary material for: Estimated Effectiveness of a Primary Cycle of Protein Recombinant Vaccine NVX-CoV2373 Against COVID-19
Source: PubMed Central journal article supplement (PMC10551773; doi:10.1001/jamanetworkopen.2023.36854), 2023-10-04
Supplement: jamanetwopen-e2336854-s003.pdf [file jamanetwopen-e2336854-s003.pdf]

## Data Sharing Statement

Mateo-Urdiales. Estimated Effectiveness of a Primary Cycle of Protein Recombinant Vaccine NVX-CoV2373 Against COVID-19. *JAMA Netw Open*. Published October 04, 2023.  
doi:10.1001/jamanetworkopen.2023.36854

### Data

**Data available:** No
